# Supplementary material
Source: PubMed Central journal article supplement (PMC8349302)
Supplement: NIHMS1727804-supplement-1.pdf [file NIHMS1727804-supplement-1.pdf]

**Appendix**  
**E-Cigarette Use Patterns and High-Risk Behaviors in Pregnancy:**  
**Behavioral Risk Factor Surveillance System 2016–2018**  
**Obisesan et al.**

**Appendix Table 1.** Demography by Pregnancy Status Showing Age-Standardized Proportions

| Characteristics                     | Currently pregnant<br>(n=7,434) |                       | Not pregnant<br>(n=212,491) |                       |
|-------------------------------------|---------------------------------|-----------------------|-----------------------------|-----------------------|
|                                     | Crude (95% CI)                  | Age-adjusted (95% CI) | Crude (95% CI)              | Age-adjusted (95% CI) |
| <b>Age, years</b>                   |                                 |                       |                             |                       |
| 18–24                               | 28.2 (26.3, 30.1)               |                       | 24.2 (23.8, 24.6)           |                       |
| 25–29                               | 26.0 (24.3, 27.8)               |                       | 15.3 (15.0, 15.6)           |                       |
| 30–34                               | 27.8 (26.0, 29.6)               |                       | 18.2 (17.9, 18.5)           |                       |
| 35–49                               | 18.0 (16.5, 19.6)               |                       | 42.4 (42.0, 42.7)           |                       |
| <b>Race</b>                         |                                 |                       |                             |                       |
| White                               | 49.3 (47.3, 51.4)               | 49.3 (47.3, 51.4)     | 54.3 (53.9, 54.7)           | 54.3 (53.9, 54.7)     |
| Black or African American           | 12.7 (11.5, 14.1)               | 12.7 (11.5, 14.1)     | 13.9 (13.6, 14.2)           | 13.9 (13.6, 14.2)     |
| Hispanic                            | 27.0 (25.0, 29.0)               | 27.0 (25.0, 29.0)     | 21.7 (21.4, 22.1)           | 21.7 (21.4, 22.1)     |
| Other                               | 11.0 (9.6, 12.6)                | 11.0 (9.6, 12.6)      | 10.1 (9.8, 10.4)            | 10.1 (9.8, 10.4)      |
| <b>Marital status</b>               |                                 |                       |                             |                       |
| Married                             | 56.5 (54.5, 58.5)               | 56.5 (54.5, 58.5)     | 43.4 (43.0, 43.8)           | 43.4 (43.0, 43.8)     |
| Divorced                            | 5.8 (4.9, 6.7)                  | 5.8 (4.9, 6.7)        | 10.6 (10.4, 10.8)           | 10.6 (10.4, 10.8)     |
| Widowed                             | 0.9 (0.5, 1.9)                  | 0.9 (0.5, 1.9)        | 0.8 (0.7, 0.8)              | 0.8 (0.7, 0.8)        |
| Single                              | 36.8 (34.8, 38.8)               | 36.8 (34.8, 38.8)     | 45.3 (44.9, 45.7)           | 45.3 (44.9, 45.7)     |
| <b>Education</b>                    |                                 |                       |                             |                       |
| Less than high school               | 15.6 (13.9, 17.5)               | 15.6 (13.9, 17.5)     | 11.8 (11.5, 12.1)           | 11.8 (11.5, 12.1)     |
| High school/Some college            | 53.7 (51.7, 55.8)               | 53.7 (51.7, 55.8)     | 57.9 (57.5, 58.3)           | 57.9 (57.5, 58.3)     |
| College graduate                    | 30.6 (28.9, 32.4)               | 30.6 (28.9, 32.4)     | 30.4 (30.0, 30.7)           | 30.4 (30.0, 30.7)     |
| <b>Employment status</b>            |                                 |                       |                             |                       |
| Employed                            | 57.6 (55.5, 59.6)               | 57.6 (55.5, 59.6)     | 62.6 (62.1, 63.0)           | 62.6 (62.1, 63.0)     |
| Unemployed                          | 36.1 (34.1, 38.2)               | 36.1 (34.1, 38.2)     | 24.9 (24.5, 25.2)           | 24.9 (24.5, 25.2)     |
| Student                             | 6.3 (5.4, 7.4)                  | 6.3 (5.4, 7.4)        | 12.3 (12.0, 12.6)           | 12.3 (12.0, 12.6)     |
| Retired                             | 0.0 (0.0, 0.1)                  | 0.0 (0.0, 0.1)        | 0.3 (0.2, 0.3)              | 0.3 (0.2, 0.3)        |
| <b>Income</b>                       |                                 |                       |                             |                       |
| Below poverty line                  | 22.9 (21.1, 24.8)               | 22.9 (21.1, 24.8)     | 21.0 (20.6, 21.4)           | 21.0 (20.6, 21.4)     |
| Within 100%–200% above poverty line | 21.3 (19.5, 23.2)               | 21.3 (19.5, 23.2)     | 19.5 (19.2, 19.9)           | 19.5 (19.2, 19.9)     |
| >200% above poverty line            | 55.8 (53.6, 57.9)               | 55.8 (53.6, 57.9)     | 59.5 (59.1, 59.9)           | 59.5 (59.1, 59.9)     |
| <b>Metropolitan area</b>            |                                 |                       |                             |                       |

**Appendix**  
**E-Cigarette Use Patterns and High-Risk Behaviors in Pregnancy:**  
**Behavioral Risk Factor Surveillance System 2016–2018**  
**Obisesan et al.**

|                                        |                   |                   |                   |                   |
|----------------------------------------|-------------------|-------------------|-------------------|-------------------|
| Center city                            | 30.6 (26.0, 35.6) | 30.6 (26.0, 35.6) | 36.1 (35.2, 37.0) | 36.1 (35.2, 37.0) |
| Same county as center city             | 25.2 (19.5, 31.8) | 25.2 (19.5, 31.8) | 25.1 (24.3, 26.0) | 25.1 (24.3, 26.0) |
| Suburban county                        | 22.5 (18.0, 27.6) | 22.5 (18.0, 27.6) | 19.4 (18.8, 20.1) | 19.4 (18.8, 20.1) |
| Outside metropolitan area              | 21.8 (18.3, 25.7) | 21.8 (18.3, 25.7) | 19.4 (18.7, 20.0) | 19.4 (18.7, 20.0) |
| <b>Smoking status</b>                  |                   |                   |                   |                   |
| Current                                | 7.0 (6.1, 8.0)    | 7.0 (6.1, 8.0)    | 15.5 (15.2, 15.7) | 15.5 (15.2, 15.7) |
| Former                                 | 18.6 (17.1, 20.3) | 18.6 (17.1, 20.3) | 12.8 (12.6, 13.1) | 12.8 (12.6, 13.1) |
| Never                                  | 74.4 (72.6, 76.1) | 74.4 (72.6, 76.1) | 71.7 (71.3, 72.0) | 71.7 (71.3, 72.0) |
| Other tobacco use <sup>a</sup>         | 0.7 (0.5, 1.0)    | 0.7 (0.5, 1.0)    | 1.1 (1.0, 1.2)    | 1.1 (1.0, 1.2)    |
| Heavy alcohol use                      | 1.7 (1.3, 2.4)    | 1.7 (1.3, 2.4)    | 6.7 (6.5, 6.9)    | 6.7 (6.5, 6.9)    |
| Marijuana use                          | 5.9 (3.7, 9.2)    | 5.9 (3.7, 9.2)    | 11.2 (10.6, 11.9) | 11.2 (10.6, 11.9) |
| Binge drinking                         | 3.8 (3.1, 4.7)    | 3.8 (3.1, 4.7)    | 18.1 (17.8, 18.4) | 18.1 (17.8, 18.4) |
| Other high risk behaviors <sup>b</sup> | 9.2 (8.0, 10.6)   | 9.2 (8.0, 10.6)   | 8.6 (8.4, 8.8)    | 8.6 (8.4, 8.8)    |
| <b>E-cigarette use, %</b>              |                   |                   |                   |                   |
| Current                                | 2.2 (1.7, 2.8)    | 2.2 (1.7, 2.8)    | 5.1 (4.9, 5.3)    | 5.1 (4.9, 5.3)    |
| Daily                                  | 0.6 (0.4, 0.9)    | 0.6 (0.4, 0.9)    | 1.5 (1.4, 1.6)    | 1.5 (1.4, 1.6)    |
| Occasional                             | 1.5 (1.1, 2.1)    | 1.5 (1.1, 2.1)    | 3.6 (3.4, 3.7)    | 3.6 (3.4, 3.7)    |
| Former                                 | 21.0 (19.3, 22.9) | 21.0 (19.3, 22.9) | 20.8 (20.4, 21.1) | 20.8 (20.4, 21.1) |
| Never                                  | 76.8 (74.9, 78.6) | 76.8 (74.9, 78.6) | 74.2 (73.8, 74.6) | 74.2 (73.8, 74.6) |

*Notes:* Results presented as % (95% CI). Weighted percentages are reported. n is the unweighted sample size in the dataset.

<sup>a</sup>Defined as current use of chewing tobacco, snuff, or snus every day or some days.

<sup>b</sup>Individuals who injected any drugs other than those prescribed in the last year, been treated for any sexually transmitted disease in the past year, or given or received money or drugs in exchange for sex in the past year.

BRFSS, Behavioral Risk Factor Surveillance System.

**Appendix**  
**E-Cigarette Use Patterns and High-Risk Behaviors in Pregnancy:**  
**Behavioral Risk Factor Surveillance System 2016–2018**  
**Obisesan et al.**

**Appendix Table 2.** Trends in E-cigarette Use Among Adult Pregnant Women, 2016 to 2018

| Variable     | 2016           | 2017           | 2018           | 2016 vs 2017     | 2017 vs 2018   |
|--------------|----------------|----------------|----------------|------------------|----------------|
|              | % (95% CI)     | % (95% CI)     | % (95% CI)     | % (95% CI)       | % (95% CI)     |
| Pregnant     | 1.9 (1.2, 2.9) | 1.6 (1.1, 2.5) | 3.8 (2.6, 5.7) | −0.2 (−1.2, 0.8) | 2.2 (0.5, 3.9) |
| Not pregnant | 4.8 (4.6, 5.1) | 4.6 (4.3, 4.9) | 6.5 (6.0, 6.9) | −0.2 (−0.6, 0.2) | 1.9 (1.3, 2.4) |

**Appendix Table 3.** Prevalence of E-cigarette Use Among Pregnant Women by Age

| E-cigarette use | 18–24 years (n=1,650) | 25–29 years (n=2,054) | 30–34 years (n=2,099) | 35–49 years (n=1,631) |
|-----------------|-----------------------|-----------------------|-----------------------|-----------------------|
|                 | % (95% CI)            | % (95% CI)            | % (95% CI)            | % (95% CI)            |
| Current         | 3.2 (2.1, 4.7)        | 2.3 (1.4, 3.7)        | 1.3 (0.8, 2.0)        | 1.7 (0.9, 3.4)        |
| Former          | 31.1 (26.9, 35.5)     | 20.7 (17.9, 23.9)     | 16.8 (13.7, 20.4)     | 12.6 (10.0, 15.7)     |
| Never           | 65.8 (61.2, 70.0)     | 77.0 (73.7, 80.0)     | 1.3 (0.8, 2.0)        | 1.7 (0.9, 3.4)        |

**Appendix**  
**E-Cigarette Use Patterns and High-Risk Behaviors in Pregnancy:**  
**Behavioral Risk Factor Surveillance System 2016–2018**  
**Obisesan et al.**

**Appendix Table 4.** Demographic Characteristics of E-cigarette Using Pregnant Women

| <b>Variable</b>                     | <b>Currently pregnant (n=142)</b><br><b>Weighted proportion (95% CI)</b> |
|-------------------------------------|--------------------------------------------------------------------------|
| <b>Age, years</b>                   |                                                                          |
| 18–24                               | 41.7 (30.3, 54.1)                                                        |
| 25–29                               | 27.5 (18.0, 39.5)                                                        |
| 30–34                               | 16.0 (10.1, 24.5)                                                        |
| 35–49                               | 14.7 (7.6, 26.7)                                                         |
| <b>Race</b>                         |                                                                          |
| White                               | 63.3 (51.1, 74.0)                                                        |
| Black or African American           | 8.0 (3.8, 16.1)                                                          |
| Hispanic                            | 17.6 (9.8, 29.7)                                                         |
| Other                               | 11.0 (5.7, 20.1)                                                         |
| <b>Marital status</b>               |                                                                          |
| Married                             | 24.0 (15.4, 35.3)                                                        |
| Divorced                            | 12.8 (7.8, 20.5)                                                         |
| Widowed                             | 5.6 (2.1, 13.8)                                                          |
| Single                              | 57.6 (45.8, 68.7)                                                        |
| <b>Education</b>                    |                                                                          |
| Less than high school               | 27.8 (17.5, 41.0)                                                        |
| High school/Some college            | 66.6 (53.8, 77.3)                                                        |
| College graduate                    | 5.6 (3.0, 10.5)                                                          |
| <b>Employment status</b>            |                                                                          |
| Employed                            | 61.7 (49.7, 72.4)                                                        |
| Unemployed                          | 31.5 (22.0, 42.9)                                                        |
| Student                             | 6.8 (2.4, 17.9)                                                          |
| Retired                             | 0.0                                                                      |
| <b>Income</b>                       |                                                                          |
| Below poverty line                  | 30.1 (20.4, 41.9)                                                        |
| Within 100%–200% above poverty line | 35.1 (23.5, 48.7)                                                        |
| >200% above poverty line            | 34.9 (23.9, 47.8)                                                        |
| <b>Metropolitan area</b>            |                                                                          |
| Center city                         | 30.2 (10.7, 61.2)                                                        |
| Same county as center city          | 6.7 (1.4, 26.0)                                                          |
| Suburban county                     | 8.2 (1.5, 34.0)                                                          |
| Outside metropolitan area           | 54.9 (23.4, 82.9)                                                        |

**Appendix**  
**E-Cigarette Use Patterns and High-Risk Behaviors in Pregnancy:**  
**Behavioral Risk Factor Surveillance System 2016–2018**  
**Obisesan et al.**

**Appendix Figure 1.** Overall prevalence of dual use among pregnant women by age categories.

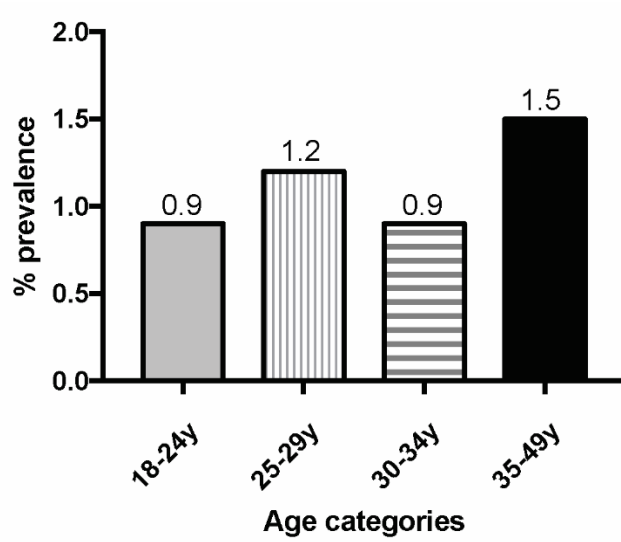

**Appendix**  
**E-Cigarette Use Patterns and High-Risk Behaviors in Pregnancy:**  
**Behavioral Risk Factor Surveillance System 2016–2018**  
**Obisesan et al.**

**Appendix Table 5.** Dual Use Patterns: Smoking by E-cigarette Use Status Among Pregnant Women

| Smoking status | E-cigarette use status            |                                    |                                   |
|----------------|-----------------------------------|------------------------------------|-----------------------------------|
|                | Current use (n=142)<br>% (95% CI) | Former use (n=1,305)<br>% (95% CI) | Never use (n=4,898)<br>% (95% CI) |
| Current        | 46.3 (34.6, 58.4)                 | 22.5 (18.8, 26.6)                  | 1.9 (1.5, 2.6)                    |
| Former         | 23.5 (15.1, 34.5)                 | 44.7 (39.8, 49.8)                  | 11.1 (9.7, 12.6)                  |
| Never          | 30.3 (20.2, 42.8)                 | 32.8 (28.5, 37.3)                  | 87.0 (85.4, 88.5)                 |

**Appendix Table 6.** Dual Use Patterns: E-cigarette Use by Smoking Status Among Pregnant Women

| E-cigarette use | Cigarette smoking status             |                                       |                                      |
|-----------------|--------------------------------------|---------------------------------------|--------------------------------------|
|                 | Current smoker (n=510)<br>% (95% CI) | Former smoker (n=1,228)<br>% (95% CI) | Never smoker (n=4,588)<br>% (95% CI) |
| Current         | 13.9 (9.8, 19.3)                     | 2.8 (1.7, 4.4)                        | 0.9 (0.6, 1.4)                       |
| Former          | 65.5 (58.6, 71.8)                    | 51.1 (45.8, 56.3)                     | 9.3 (8.0, 10.8)                      |
| Never           | 20.6 (15.7, 26.5)                    | 46.2 (41.0, 51.4)                     | 89.9 (88.3, 91.2)                    |

**Appendix Table 7.** Prevalence of High-risk Behaviors Among Pregnant Women by E-Cigarette Use Status

| Variable                  | Current use (n=142)<br>% (95% CI) | Former use (n=1,305)<br>% (95% CI) | Never use (n=4,898)<br>% (95% CI) |
|---------------------------|-----------------------------------|------------------------------------|-----------------------------------|
| Other tobacco use         | 3.6 (1.3, 9.5)                    | 1.0 (0.5, 1.7)                     | 0.5 (0.3, 0.8)                    |
| Marijuana use             | 46.8 (19.9, 75.7)                 | 10.8 (5.8, 19.3)                   | 3.1 (1.1, 8.2)                    |
| Heavy alcohol use         | 12.0 (6.2, 22.1)                  | 2.3 (1.4, 3.7)                     | 1.3 (0.7, 2.2)                    |
| Binge drinking            | 24.1 (14.1, 38.0)                 | 7.1 (5.3, 9.6)                     | 2.6 (1.9, 3.6)                    |
| Other high risk behaviors | 22.6 (14.1, 34.3)                 | 18.3 (14.2, 23.4)                  | 6.0 (5.0, 7.3)                    |
